# Supplementary material
Source: PubMed Central journal article supplement (PMC5649018)
Supplement: IAI.00148-17_zii999092199s1.pdf [file IAI.00148-17_zii999092199s1.pdf]

## SUPPLEMENTARY TABLE.

### CCL Gene Regulation after ME Inoculation with NTHI.

For each chemokine differentially regulated during OM, the Affymetrix transcript ID, alternate name and chemoattraction profile (43) is presented, followed by regulation during the course of an episode of acute OM.

#### CCL GENES UPREGULATED EARLY IN OM (3-24 hrs)

|                                                                                                      | Time in hrs    | Fold change (range)           | Significance    |
|------------------------------------------------------------------------------------------------------|----------------|-------------------------------|-----------------|
| <u>CCL4 1421578 at (MIP-1<math>\beta</math>; macrophage and natural killer cell chemoattractant)</u> |                |                               |                 |
|                                                                                                      | 0.0 ,          | 0.999 (0.953 to 1.047)        | 0.985           |
|                                                                                                      | 3.0 ,          | 9.119 (7.256 to 11.46)        | 0.0656          |
| <b>Time</b>                                                                                          | <b>6.0 ,</b>   | <b>12.43 (10.2 to 15.15)</b>  | <b>0.0498</b>   |
| <b>Time</b>                                                                                          | <b>24.0 ,</b>  | <b>25.91 (20.07 to 33.43)</b> | <b>0.0498</b>   |
|                                                                                                      | 48.0 ,         | 8.658 (7.293 to 10.28)        | 0.0505          |
|                                                                                                      | 72.0 ,         | 2.739 (2.2 to 3.411)          | 0.136           |
|                                                                                                      | 120.0 ,        | 0.75 (0.574 to 0.979)         | 0.476           |
|                                                                                                      | 168.0 ,        | 1.009 (0.876 to 1.161)        | 0.96            |
| <u>CCL5 1418126 at (RANTES; macrophage and natural killer cell chemoattractant)</u>                  |                |                               |                 |
|                                                                                                      | 0.0 ,          | 1 (0.988 to 1.012)            | 0.996           |
|                                                                                                      | 3.0 ,          | 5.417 (3.311 to 8.863)        | 0.18            |
| <b>Time</b>                                                                                          | <b>6.0 ,</b>   | <b>9.342 (8.404 to 10.38)</b> | <b>0.0301</b>   |
| <b>Time</b>                                                                                          | <b>24.0 ,</b>  | <b>6.542 (5.727 to 7.472)</b> | <b>0.045</b>    |
|                                                                                                      | 48.0 ,         | 1.933 (1.769 to 2.112)        | 0.085           |
|                                                                                                      | 72.0 ,         | 1.169 (0.584 to 2.34)         | 0.859           |
|                                                                                                      | 120.0 ,        | 0.801 (0.775 to 0.828)        | 0.0935          |
|                                                                                                      | 168.0 ,        | 0.975 (0.883 to 1.077)        | 0.841           |
| <u>CCL11 1417789 at (Eotaxin-1; eosinophil and basophil chemoattractant)</u>                         |                |                               |                 |
|                                                                                                      | 0.0 ,          | 0.82 (0.427 to 1.573)         | 0.811           |
|                                                                                                      | 3.0 ,          | 12.73 (8.317 to 19.47)        | 0.105           |
| <b>Time</b>                                                                                          | <b>6.0 ,</b>   | <b>15.83 (14.44 to 17.34)</b> | <b>0.0211</b>   |
|                                                                                                      | 24.0 ,         | 3.25 (2.76 to 3.828)          | 0.0878          |
|                                                                                                      | 48.0 ,         | 0.673 (0.282 to 1.604)        | 0.727           |
|                                                                                                      | 72.0 ,         | 0.547 (0.328 to 0.91)         | 0.446           |
|                                                                                                      | 120.0 ,        | 1.816 (1.592 to 2.072)        | 0.138           |
| <b>Time</b>                                                                                          | <b>168.0 ,</b> | <b>2.643 (2.618 to 2.669)</b> | <b>0.00634</b>  |
| <u>CCL17 1419413 at (TARC; t-cell chemoattractant)</u>                                               |                |                               |                 |
|                                                                                                      | 0.0 ,          | 0.997 (0.919 to 1.081)        | 0.974           |
| <b>Time</b>                                                                                          | <b>3.0 ,</b>   | <b>5.098 (4.676 to 5.558)</b> | <b>0.0337</b>   |
| <b>Time</b>                                                                                          | <b>6.0 ,</b>   | <b>5.263 (4.796 to 5.776)</b> | <b>0.0356</b>   |
|                                                                                                      | 24.0 ,         | 1.838 (1.714 to 1.972)        | 0.0731          |
|                                                                                                      | 48.0 ,         | 0.896 (0.779 to 1.03)         | 0.574           |
|                                                                                                      | 72.0 ,         | 1.153 (0.984 to 1.352)        | 0.535           |
|                                                                                                      | 120.0 ,        | 0.648 (0.594 to 0.707)        | 0.126           |
|                                                                                                      | 168.0 ,        | 0.845 (0.83 to 0.859)         | 0.0645          |
| <u>CCL20 1422029 at (MIP-3<math>\alpha</math>; dendritic cell and b-cell chemoattractant)</u>        |                |                               |                 |
|                                                                                                      | 0.0 ,          | 0.902 (0.569 to 1.431)        | 0.86            |
| <b>Time</b>                                                                                          | <b>3.0 ,</b>   | <b>151.3 (133.9 to 171)</b>   | <b>0.0155</b>   |
| <b>Time</b>                                                                                          | <b>6.0 ,</b>   | <b>165.7 (150.6 to 182.2)</b> | <b>0.0119</b>   |
| <b>Time</b>                                                                                          | <b>24.0 ,</b>  | <b>45.8 (45.69 to 45.92)</b>  | <b>0.000422</b> |
|                                                                                                      | 48.0 ,         | 8.24 (5.044 to 13.46)         | 0.146           |
| <b>Time</b>                                                                                          | <b>72.0 ,</b>  | <b>6.049 (5.461 to 6.7)</b>   | <b>0.0361</b>   |
| <b>Time</b>                                                                                          | <b>120.0 ,</b> | <b>2.771 (2.682 to 2.862)</b> | <b>0.0202</b>   |
| <b>Time</b>                                                                                          | <b>168.0 ,</b> | <b>2.959 (1.139 to 7.686)</b> | <b>0.459</b>    |
| <u>CCL22 1417925 at (MDC; t-cell chemoattractant)</u>                                                |                |                               |                 |
|                                                                                                      | 0.0 ,          | 0.882 (0.529 to 1.471)        | 0.847           |
| <b>Time</b>                                                                                          | <b>3.0 ,</b>   | <b>4.649 (4.475 to 4.829)</b> | <b>0.0158</b>   |
| <b>Time</b>                                                                                          | <b>6.0 ,</b>   | <b>5.626 (5.137 to 6.162)</b> | <b>0.0335</b>   |
|                                                                                                      | 24.0 ,         | 2.923 (2.289 to 3.733)        | 0.143           |
|                                                                                                      | 48.0 ,         | 1.428 (0.766 to 2.663)        | 0.669           |
|                                                                                                      | 72.0 ,         | 0.869 (0.818 to 0.924)        | 0.26            |
|                                                                                                      | 120.0 ,        | 0.993 (0.763 to 1.294)        | 0.984           |
|                                                                                                      | 168.0 ,        | 0.917 (0.643 to 1.307)        | 0.847           |
| <u>CCL28 1450218 at (MEC; t-cell and IgA-expressing b-cell chemoattractant)</u>                      |                |                               |                 |
|                                                                                                      | 0.0 ,          | 0.986 (0.831 to 1.169)        | 0.946           |
|                                                                                                      | 3.0 ,          | 1.262 (1.239 to 1.284)        | 0.049           |
|                                                                                                      | 6.0 ,          | 1.369 (1.153 to 1.627)        | 0.319           |
| <b>Time</b>                                                                                          | <b>24.0 ,</b>  | <b>4.982 (4.853 to 5.115)</b> | <b>0.0104</b>   |
|                                                                                                      | 48.0 ,         | 1.382 (0.998 to 1.913)        | 0.502           |
|                                                                                                      | 72.0 ,         | 1.453 (1.202 to 1.756)        | 0.299           |
|                                                                                                      | 120.0 ,        | 1.598 (1.339 to 1.908)        | 0.23            |
|                                                                                                      | 168.0 ,        | 1.875 (1.491 to 2.358)        | 0.222           |

**CCL GENES UPREGULATED LATE IN OM (48-72 hrs)**

|                                                                                                                            | Time in hrs | Fold change (range)           | Significance  |
|----------------------------------------------------------------------------------------------------------------------------|-------------|-------------------------------|---------------|
| <u>CCL6 1417266 at (HCC-4, mouse only; natural killer and dendritic cell chemoattractant; antibacterial activity) (44)</u> |             |                               |               |
|                                                                                                                            | 0.0 ,       | 0.995 (0.904 to 1.096)        | 0.97          |
| Time                                                                                                                       | 3.0 ,       | <b>3.866 (3.517 to 4.25)</b>  | <b>0.0445</b> |
| Time                                                                                                                       | 6.0 ,       | <b>4.76 (4.429 to 5.115)</b>  | <b>0.0294</b> |
| Time                                                                                                                       | 24.0 ,      | <b>16.56 (13.57 to 20.21)</b> | <b>0.0451</b> |
| Time                                                                                                                       | 48.0 ,      | <b>23.78 (22.29 to 25.37)</b> | <b>0.013</b>  |
| Time                                                                                                                       | 72.0 ,      | <b>23.52 (19.58 to 28.25)</b> | <b>0.0369</b> |
|                                                                                                                            | 120.0 ,     | 2.034 (1.765 to 2.344)        | 0.126         |
|                                                                                                                            | 168.0 ,     | 1.745 (1.454 to 2.096)        | 0.202         |

|                                                          |         |                               |                |
|----------------------------------------------------------|---------|-------------------------------|----------------|
| <u>CCL7 1411228 at (MCP-3; monocyte chemoattractant)</u> |         |                               |                |
|                                                          | 0.0 ,   | 0.92 (0.609 to 1.391)         | 0.874          |
| Time                                                     | 3.0 ,   | <b>9.558 (8.516 to 10.73)</b> | <b>0.0325</b>  |
| Time                                                     | 6.0 ,   | <b>10.1 (9.137 to 11.17)</b>  | <b>0.0276</b>  |
| Time                                                     | 24.0 ,  | <b>15.16 (12.79 to 17.96)</b> | <b>0.0397</b>  |
| Time                                                     | 48.0 ,  | <b>63.09 (50.8 to 78.36)</b>  | <b>0.0333</b>  |
| Time                                                     | 72.0 ,  | <b>41.91 (40.15 to 43.75)</b> | <b>0.00732</b> |
| Time                                                     | 120.0 , | <b>2.35 (2.22 to 2.488)</b>   | <b>0.0424</b>  |
|                                                          | 168.0 , | 1.563 (1.25 to 1.956)         | 0.296          |

|                                                            |         |                               |                |
|------------------------------------------------------------|---------|-------------------------------|----------------|
| <u>CCL8 1419684 at (MCP-2; macrophage chemoattractant)</u> |         |                               |                |
|                                                            | 0.0 ,   | 1 (0.997 to 1.003)            | 0.999          |
|                                                            | 3.0 ,   | 0.891 (0.791 to 1.004)        | 0.51           |
|                                                            | 6.0 ,   | 1.019 (1.006 to 1.032)        | 0.377          |
| Time                                                       | 24.0 ,  | <b>0.455 (0.431 to 0.479)</b> | <b>0.0429</b>  |
|                                                            | 48.0 ,  | 2.504 (1.975 to 3.176)        | 0.161          |
| Time                                                       | 72.0 ,  | <b>5.675 (5.564 to 5.789)</b> | <b>0.00725</b> |
| Time                                                       | 120.0 , | <b>1.683 (1.647 to 1.72)</b>  | <b>0.0267</b>  |
|                                                            | 168.0 , | 1.922 (1.773 to 2.083)        | 0.0781         |

|                                                                                                          |         |                               |                |
|----------------------------------------------------------------------------------------------------------|---------|-------------------------------|----------------|
| <u>CCL9 (MIP-1<math>\gamma</math>) 1417936 at (dendritic cell chemoattractant; osteoclast activator)</u> |         |                               |                |
|                                                                                                          | 0.0 ,   | 0.996 (0.907 to 1.093)        | 0.97           |
| Time                                                                                                     | 3.0 ,   | <b>3.434 (3.3 to 3.572)</b>   | <b>0.0204</b>  |
|                                                                                                          | 6.0 ,   | 3.942 (3.42 to 4.544)         | 0.0658         |
| Time                                                                                                     | 24.0 ,  | <b>10.92 (9.35 to 12.77)</b>  | <b>0.0414</b>  |
| Time                                                                                                     | 48.0 ,  | <b>18.33 (16.96 to 19.81)</b> | <b>0.017</b>   |
| Time                                                                                                     | 72.0 ,  | <b>15.44 (13.27 to 17.96)</b> | <b>0.0351</b>  |
| Time                                                                                                     | 120.0 , | <b>2.69 (2.657 to 2.723)</b>  | <b>0.00786</b> |
| Time                                                                                                     | 168.0 , | <b>2.314 (2.302 to 2.326)</b> | <b>0.00393</b> |

|                                                                               |         |                               |                |
|-------------------------------------------------------------------------------|---------|-------------------------------|----------------|
| <u>CCL12 1419282 at (eosinophil, monocyte and lymphocyte chemoattractant)</u> |         |                               |                |
|                                                                               | 0.0 ,   | 0.979 (0.796 to 1.204)        | 0.935          |
| Time                                                                          | 3.0 ,   | <b>9.297 (9.027 to 9.575)</b> | <b>0.00841</b> |
|                                                                               | 6.0 ,   | 6.875 (4.325 to 10.93)        | 0.15           |
|                                                                               | 24.0 ,  | 4.959 (4.065 to 6.05)         | 0.0786         |
| Time                                                                          | 48.0 ,  | <b>57.78 (49.76 to 67.09)</b> | <b>0.0234</b>  |
| Time                                                                          | 72.0 ,  | <b>32.34 (31.62 to 33.08)</b> | <b>0.00413</b> |
| Time                                                                          | 120.0 , | <b>5.078 (4.945 to 5.214)</b> | <b>0.0103</b>  |
| Time                                                                          | 168.0 , | <b>4.242 (4.178 to 4.307)</b> | <b>0.00669</b> |

**CCL GENES UPREGULATED BOTH EARLY AND LATE IN OM**

|                                                          | Time in hrs | Fold change (range)           | Significance  |
|----------------------------------------------------------|-------------|-------------------------------|---------------|
| <u>CCL2 1420380 at (MCP-1; monocyte chemoattractant)</u> |             |                               |               |
|                                                          | 0.0 ,       | 0.988 (0.846 to 1.154)        | 0.951         |
|                                                          | 3.0 ,       | 37.81 (25.18 to 56.78)        | 0.0709        |
| Time                                                     | 6.0 ,       | <b>45.43 (41.63 to 49.58)</b> | <b>0.0146</b> |
| Time                                                     | 24.0 ,      | <b>27.64 (24.09 to 31.72)</b> | <b>0.0264</b> |
| Time                                                     | 48.0 ,      | <b>71.38 (62.63 to 81.34)</b> | <b>0.0195</b> |
| Time                                                     | 72.0 ,      | <b>38.63 (32.26 to 46.25)</b> | <b>0.0313</b> |
| Time                                                     | 120.0 ,     | <b>2.482 (2.357 to 2.613)</b> | <b>0.0361</b> |
|                                                          | 168.0 ,     | 1.806 (1.645 to 1.983)        | 0.0997        |

|                                                                              |         |                               |               |
|------------------------------------------------------------------------------|---------|-------------------------------|---------------|
| <u>CCL3 1419561 at (macrophage, monocyte and neutrophil chemoattractant)</u> |         |                               |               |
|                                                                              | 0.0 ,   | 0.677 (0.264 to 1.736)        | 0.75          |
| Time                                                                         | 3.0 ,   | <b>113.3 (98.49 to 130.4)</b> | <b>0.0189</b> |
| Time                                                                         | 6.0 ,   | <b>174.9 (160 to 191.1)</b>   | <b>0.0109</b> |
| Time                                                                         | 24.0 ,  | <b>603.9 (463.6 to 786.7)</b> | <b>0.0263</b> |
| Time                                                                         | 48.0 ,  | <b>294.4 (268.9 to 322.4)</b> | <b>0.0102</b> |
| Time                                                                         | 72.0 ,  | <b>229.7 (151.1 to 349.1)</b> | <b>0.0489</b> |
| Time                                                                         | 120.0 , | <b>8.812 (7.777 to 9.984)</b> | <b>0.0365</b> |
|                                                                              | 168.0 , | 3.306 (2.125 to 5.145)        | 0.225         |

### CCL GENE DOWNREGULATED DURING OM

| Time in hrs                                        | Fold change (range)           | Significance  |
|----------------------------------------------------|-------------------------------|---------------|
| <u>CCL27 1434962_x_at (t-cell chemoattractant)</u> |                               |               |
| 0.0 ,                                              | 1 (0.971 to 1.029)            | 0.991         |
| 3.0 ,                                              | 0.817 (0.733 to 0.911)        | 0.315         |
| 6.0 ,                                              | 0.584 (0.517 to 0.659)        | 0.142         |
| 24.0 ,                                             | 0.605 (0.55 to 0.665)         | 0.118         |
| <b>Time 48.0 ,</b>                                 | <b>0.532 (0.525 to 0.538)</b> | <b>0.0123</b> |
| 72.0 ,                                             | 0.692 (0.61 to 0.787)         | 0.213         |
| 120.0 ,                                            | 0.945 (0.872 to 1.025)        | 0.612         |
| 168.0 ,                                            | 0.86 (0.757 to 0.976)         | 0.444         |

### CCL GENES NOT SIGNIFICANTLY REGULATED DURING OM

|        |                                                             |
|--------|-------------------------------------------------------------|
| CCL1   | (TCA3; t-cell chemoattractant)                              |
| CCL19  | (MIP-3 $\beta$ ; dendritic cell and t-cell chemoattractant) |
| CCL21B | (SLC; dendritic cell and t-cell chemoattractant)            |
| CCL24  | (Eotaxin-3; eosinophil and basophil chemoattractant)        |
| CCL25  | (TECK; t-cell chemoattractant)                              |

### CCL GENES NOT FOUND ON THE AFFYMETRIX ARRAY

|       |                                                            |
|-------|------------------------------------------------------------|
| CCL26 | NOT ON THE ARRAY (eosinophil and basophil chemoattractant) |
|-------|------------------------------------------------------------|

### OTHER

|       |                                                          |
|-------|----------------------------------------------------------|
| CCL10 | TERM NO LONGER IN USE (now CCL9 in both human and mouse) |
| CCL13 | NO MOUSE HOMOLOGUE                                       |
| CCL14 | NONFUNCTIONAL GENE IN MOUSE                              |
| CCL15 | NONFUNCTIONAL GENE IN MOUSE                              |
| CCL16 | NO MOUSE HOMOLOGUE                                       |
| CCL18 | NO MOUSE HOMOLOGUE                                       |
| CCL23 | NO MOUSE HOMOLOGUE                                       |
